# Supplementary material
Source: PubMed Central journal article supplement (PMC7242782)

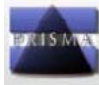

# PRISMA 2009 Checklist

| Section/topic                      | #  | Checklist item                                                                                                                                                                                                                                                                                              | Reported on page # |
|------------------------------------|----|-------------------------------------------------------------------------------------------------------------------------------------------------------------------------------------------------------------------------------------------------------------------------------------------------------------|--------------------|
| <b>TITLE</b>                       |    |                                                                                                                                                                                                                                                                                                             |                    |
| Title                              | 1  | Identify the report as a systematic review, meta-analysis, or both.                                                                                                                                                                                                                                         | Pg.1               |
| <b>ABSTRACT</b>                    |    |                                                                                                                                                                                                                                                                                                             |                    |
| Structured summary                 | 2  | Provide a structured summary including, as applicable: background; objectives; data sources; study eligibility criteria, participants, and interventions; study appraisal and synthesis methods; results; limitations; conclusions and implications of key findings; systematic review registration number. | Pg.3               |
| <b>INTRODUCTION</b>                |    |                                                                                                                                                                                                                                                                                                             |                    |
| Rationale                          | 3  | Describe the rationale for the review in the context of what is already known.                                                                                                                                                                                                                              | Pgs.5-6            |
| Objectives                         | 4  | Provide an explicit statement of questions being addressed with reference to participants, interventions, comparisons, outcomes, and study design (PICOS).                                                                                                                                                  | Pg.6               |
| <b>METHODS</b>                     |    |                                                                                                                                                                                                                                                                                                             |                    |
| Protocol and registration          | 5  | Indicate if a review protocol exists, if and where it can be accessed (e.g., Web address), and, if available, provide registration information including registration number.                                                                                                                               | Pg.6               |
| Eligibility criteria               | 6  | Specify study characteristics (e.g., PICOS, length of follow-up) and report characteristics (e.g., years considered, language, publication status) used as criteria for eligibility, giving rationale.                                                                                                      | Pgs.6-7            |
| Information sources                | 7  | Describe all information sources (e.g., databases with dates of coverage, contact with study authors to identify additional studies) in the search and date last searched.                                                                                                                                  | Pgs.6-7            |
| Search                             | 8  | Present full electronic search strategy for at least one database, including any limits used, such that it could be repeated.                                                                                                                                                                               | Pgs. 6-7           |
| Study selection                    | 9  | State the process for selecting studies (i.e., screening, eligibility, included in systematic review, and, if applicable, included in the meta-analysis).                                                                                                                                                   | Pgs. 7-8           |
| Data collection process            | 10 | Describe method of data extraction from reports (e.g., piloted forms, independently, in duplicate) and any processes for obtaining and confirming data from investigators.                                                                                                                                  | Pg. 9              |
| Data items                         | 11 | List and define all variables for which data were sought (e.g., PICOS, funding sources) and any assumptions and simplifications made.                                                                                                                                                                       | Pg.9               |
| Risk of bias in individual studies | 12 | Describe methods used for assessing risk of bias of individual studies (including specification of whether this was done at the study or outcome level), and how this information is to be used in any data synthesis.                                                                                      | Pg. 9              |
| Summary measures                   | 13 | State the principal summary measures (e.g., risk ratio, difference in means).                                                                                                                                                                                                                               | Pgs.10-11          |

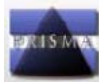

# PRISMA 2009 Checklist

|                      |    |                                                                                                                                                           |            |
|----------------------|----|-----------------------------------------------------------------------------------------------------------------------------------------------------------|------------|
| Synthesis of results | 14 | Describe the methods of handling data and combining results of studies, if done, including measures of consistency (e.g., $I^2$ ) for each meta-analysis. | Pgs. 10-11 |
|----------------------|----|-----------------------------------------------------------------------------------------------------------------------------------------------------------|------------|

| Section/topic                 | #  | Checklist item                                                                                                                                                                                           | Reported on page # |
|-------------------------------|----|----------------------------------------------------------------------------------------------------------------------------------------------------------------------------------------------------------|--------------------|
| Risk of bias across studies   | 15 | Specify any assessment of risk of bias that may affect the cumulative evidence (e.g., publication bias, selective reporting within studies).                                                             | Pg.10              |
| Additional analyses           | 16 | Describe methods of additional analyses (e.g., sensitivity or subgroup analyses, meta-regression), if done, indicating which were pre-specified.                                                         | Pg.10              |
| <b>RESULTS</b>                |    |                                                                                                                                                                                                          |                    |
| Study selection               | 17 | Give numbers of studies screened, assessed for eligibility, and included in the review, with reasons for exclusions at each stage, ideally with a flow diagram.                                          | Pg.11              |
| Study characteristics         | 18 | For each study, present characteristics for which data were extracted (e.g., study size, PICOS, follow-up period) and provide the citations.                                                             | Pgs.11-12          |
| Risk of bias within studies   | 19 | Present data on risk of bias of each study and, if available, any outcome level assessment (see item 12).                                                                                                | Pg. 12             |
| Results of individual studies | 20 | For all outcomes considered (benefits or harms), present, for each study: (a) simple summary data for each intervention group (b) effect estimates and confidence intervals, ideally with a forest plot. | Pgs. 13 and 15     |
| Synthesis of results          | 21 | Present results of each meta-analysis done, including confidence intervals and measures of consistency.                                                                                                  | Pgs.13-14-15-16-17 |
| Risk of bias across studies   | 22 | Present results of any assessment of risk of bias across studies (see Item 15).                                                                                                                          | Pg. 12             |
| Additional analysis           | 23 | Give results of additional analyses, if done (e.g., sensitivity or subgroup analyses, meta-regression [see Item 16]).                                                                                    | Pgs.13-14-15-16-17 |
| <b>DISCUSSION</b>             |    |                                                                                                                                                                                                          |                    |
| Summary of evidence           | 24 | Summarize the main findings including the strength of evidence for each main outcome; consider their relevance to key groups (e.g., healthcare providers, users, and policy makers).                     | Pg.18              |
| Limitations                   | 25 | Discuss limitations at study and outcome level (e.g., risk of bias), and at review-level (e.g., incomplete retrieval of identified research, reporting bias).                                            | Pgs.18-19          |
| Conclusions                   | 26 | Provide a general interpretation of the results in the context of other evidence, and implications for future research.                                                                                  | Pgs.19-20-21       |
| <b>FUNDING</b>                |    |                                                                                                                                                                                                          |                    |

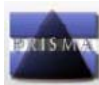

# PRISMA 2009 Checklist

|         |    |                                                                                                                                            |                   |
|---------|----|--------------------------------------------------------------------------------------------------------------------------------------------|-------------------|
| Funding | 27 | Describe sources of funding for the systematic review and other support (e.g., supply of data); role of funders for the systematic review. | Pgs. 11<br>and 22 |
|---------|----|--------------------------------------------------------------------------------------------------------------------------------------------|-------------------|

*From:* Moher D, Liberati A, Tetzlaff J, Altman DG, The PRISMA Group (2009). Preferred Reporting Items for Systematic Reviews and Meta-Analyses: The PRISMA Statement. PLoS Med 6(6): e1000097. doi:10.1371/journal.pmed1000097

For more information, visit: [www.prisma-statement.org](http://www.prisma-statement.org).

## Online only supplemental materials

### Supplemental Tables:

*sTable 1: Search Strategies (Medline and Embase)*

*sTable 2: Risk of bias assessments using PROBAST for risk assessment model studies*

*sTable 3: Risk of bias assessments using Quips for prognostic factor studies*

*sTable 4: Sensitivity analysis of studies that report an association between prognostic factors and symptomatic VTE only.*

## Supplemental Tables

*sTable 1: Search Strategies (Medline and Embase)*

### Medline

Search name: z - Prognostic SR\_Medline2

| OVERVIEW                                          |                                                                                              |
|---------------------------------------------------|----------------------------------------------------------------------------------------------|
| Interface:                                        | Ovid                                                                                         |
| Database:                                         | Ovid MEDLINE(R) In-Process & Other Non-Indexed Citations and Ovid MEDLINE(R) 1946 to Present |
| Date of Search:                                   | 28 October 2017- alerts till May 2018                                                        |
| Study Types:                                      | All                                                                                          |
| Limits:                                           | Publication date: No limit                                                                   |
| Search Strategy: search terms (number of results) |                                                                                              |
| <b>VTE Block:</b>                                 |                                                                                              |
| 1                                                 | Primary Prevention/ (17503)                                                                  |
| 2                                                 | Venous Thrombosis/pc [Prevention & Control] (4385)                                           |
| 3                                                 | Venous Thromboembolism/pc [Prevention & Control] (3582)                                      |
| 4                                                 | Pulmonary Embolism/pc [Prevention & Control] (4886)                                          |
| 5                                                 | Prevent*.mp. (1332101)                                                                       |

- 6 Thromboprophylax\*.mp. [mp=title, abstract, original title, name of substance word, subject heading word, keyword heading word, protocol supplementary concept word, rare disease supplementary concept word, unique identifier, synonyms] (4072)
- 7 Prophylax\*.mp. (104027)
- 8 1 or 2 or 3 or 4 or 5 or 6 or 7 (1405763)
- 9 exp Venous Thromboembolism/ or exp Thromboembolism/ (53573)
- 10 exp Pulmonary Embolism/ (37750)
- 11 exp Venous Thrombosis/ (53428)
- 12 Thrombophlebitis/ (22521)
- 13 (DVT or VTE or PE).mp. [mp=title, abstract, original title, name of substance word, subject heading word, keyword heading word, protocol supplementary concept word, rare disease supplementary concept word, unique identifier, synonyms] (48782)
- 14 ((Pulmon\* or vein or venous or lung) adj (Emboli\* or thromb\*)).mp. [mp=title, abstract, original title, name of substance word, subject heading word, keyword heading word, protocol supplementary concept word, rare disease supplementary concept word, unique identifier, synonyms] (107521)
- 15 (thrombus\* or thrombotic\* or thrombolic\* or thromboemboli\* or thrombos\* or embol\*).mp. [mp=title, abstract, original title, name of substance word, subject heading word, keyword heading word, protocol supplementary concept word, rare disease supplementary concept word, unique identifier, synonyms] (377373)
- 16 (((deep or thromb\* or stasis) adj2 (vein\* or venous)) or (blood flow stasis or blood clot)).mp. [mp=title, abstract, original title, name of substance word, subject heading word,

keyword heading word, protocol supplementary concept word, rare disease supplementary  
concept word, unique identifier, synonyms] (79440)

17 9 or 10 or 11 or 12 or 13 or 14 or 15 or 16 (425979)

18 8 and 17 (55938)

**Prognosis filter:**

19 Incidence.sh. (240248)

20 exp Mortality/ (359024)

21 Follow-Up Studies.sh. (628038)

22 Prognos:.tw. (524700)

23 Predict:.tw. (1363351)

24 Course:.tw. (580752)

25 19 or 20 or 21 or 22 or 23 or 24 (3152981)

26 18 and 25 (11256)

**Clinical prediction guide filter:**

27 predict:.mp. (1444321)

28 scor:.tw. (814052)

29 observ:.mp. (3283307)

30 27 or 28 or 29 (5007508)

31 18 and 30 (11822)

32 26 or 31 (17981)

**Records Retrieved: 17981**

## Embase

Search name: z - Prognostic SR\_Embase2

### OVERVIEW

Interface: Ovid

Database: Ovid MEDLINE(R) In-Process & Other Non-Indexed Citations and Ovid  
MEDLINE(R) 1946 to Present

Date of Search: 28 October 2017- alerts till May 2018

Study Types:

Limits: Publication date: No limit

### Search Strategy: search terms (number of results)

#### VTE Block:

- 1 Primary Prevention/ (35278)
- 2 Venous Thrombosis/pc [Prevention & Control] (785)
- 3 Venous Thromboembolism/pc [Prevention & Control] (7088)
- 4 Pulmonary Embolism/pc [Prevention & Control] (1752)
- 5 Prevent\*.mp. (2477729)
- 6 Thromboprophylax\*.mp. [mp=title, abstract, heading word, drug trade name, original title, device manufacturer, drug manufacturer, device trade name, keyword, floating subheading word] (6379)
- 7 Prophylax\*.mp. (195774)
- 8 1 or 2 or 3 or 4 or 5 or 6 or 7 (2548335)



- 9 exp Venous Thromboembolism/ or exp Thromboembolism/ (433469)
- 10 exp Pulmonary Embolism/ (80922)
- 11 exp Venous Thrombosis/ (114178)
- 12 Thrombophlebitis/ (15800)
- 13 (DVT or VTE or PE).mp. [mp=title, abstract, heading word, drug trade name, original title, device manufacturer, drug manufacturer, device trade name, keyword, floating subheading word] (144215)
- 14 ((Pulmon\* or vein or venous or lung) adj (Emboli\* or thromb\*)).mp. [mp=title, abstract, heading word, drug trade name, original title, device manufacturer, drug manufacturer, device trade name, keyword, floating subheading word] (192152)
- 15 (thrombus\* or thrombotic\* or thrombolic\* or thromboemboli\* or thrombos\* or embol\*).mp. [mp=title, abstract, heading word, drug trade name, original title, device manufacturer, drug manufacturer, device trade name, keyword, floating subheading word] (597995)
- 16 (((deep or thromb\* or stasis) adj2 (vein\* or venous)) or (blood flow stasis or blood clot)).mp. [mp=title, abstract, heading word, drug trade name, original title, device manufacturer, drug manufacturer, device trade name, keyword, floating subheading word] (182911)
- 17 9 or 10 or 11 or 12 or 13 or 14 or 15 or 16 (752356)
- 18 8 and 17 (147813)
- Prognosis filter:**
- 19 follow-up.mp. (1606000)

20 prognos:.tw. (730265)

21 ep.fs. (986253)

22 19 or 20 or 21 (3063360)

23 18 and 22 (30227)

**Clinical prediction guide filter:**

24 validat:.mp. (630471)

25 index.tw. (873592)

26 model.tw. (2141395)

27 24 or 25 or 26 (3382557)

28 18 and 27 (15370)

29 23 or 28 (42534)

**Records Retrieved: 42534**

*sTable 2: Risk of bias assessments using PROBAST for risk assessment model studies*

| <b>Author</b>      | <b>Year</b> | <b>Participants</b> | <b>Predictors</b> | <b>Outcome</b> | <b>Analysis</b> | <b>Overall</b> |
|--------------------|-------------|---------------------|-------------------|----------------|-----------------|----------------|
| <b>Decousus</b>    | 2011        | +                   | +                 | +              | -               | -              |
| <b>Grant</b>       | 2016        | +                   | +                 | +              | -               | -              |
| <b>Mahan</b>       | 2014        | +                   | +                 | +              | -               | -              |
| <b>Rosenberg</b>   | 2014        | +                   | +                 | -              | +               | -              |
| <b>Rothberg</b>    | 2011        | +                   | +                 | +              | -               | -              |
| <b>Spyropoulos</b> | 2011        | +                   | +                 | +              | -               | -              |
| <b>Zakai</b>       | 2004        | +                   | +                 | -              | -               | -              |
| <b>Zakai</b>       | 2013        | +                   | +                 | -              | -               | -              |
| <b>Zhou</b>        | 2018        | +                   | +                 | -              | +               | -              |

***sTable 3: Risk of bias assessments using Quips for prognostic factor studies***

| <b>Author</b>   | <b>Year</b> | <b>Study participation</b> | <b>Study attrition</b> | <b>Prognostic factor measurement</b> | <b>Outcome measurement</b> | <b>Study confounding</b> | <b>Statistical analysis and reporting</b> |
|-----------------|-------------|----------------------------|------------------------|--------------------------------------|----------------------------|--------------------------|-------------------------------------------|
| <b>Barclay</b>  | 2013        | Yes                        | Not reported           | Yes                                  | Yes                        | Yes                      | No                                        |
| <b>Bembenek</b> | 2011        | Yes                        | 29.6                   | Yes                                  | Yes                        | Yes                      | Yes                                       |
| <b>Fan</b>      | 2011        | Yes                        | 26.8                   | Yes                                  | Yes                        | Yes                      | No                                        |
| <b>Kelly</b>    | 2004        | Yes                        | 23.6                   | Yes                                  | Yes                        | Yes                      | No                                        |
| <b>Mahan</b>    | 2013        | Yes                        | 32.6                   | Yes                                  | No                         | Yes                      | No                                        |
| <b>Ota</b>      | 2009        | Yes                        | 0                      | Yes                                  | Yes                        | Yes                      | No                                        |
| <b>Patell</b>   | 2017        | Yes                        | 3.8                    | Yes                                  | No                         | Yes                      | No                                        |
| <b>Yi</b>       | 2012        | Yes                        | 4                      | Yes                                  | Yes                        | Yes                      | No                                        |

**Table 4: Sensitivity analysis of studies that report an association between prognostic factors and symptomatic VTE only.**

| Prognostic factor        | Analysis             | Number of effect estimates | Number of studies | Sample size | Pooled OR | 95% CI |       |
|--------------------------|----------------------|----------------------------|-------------------|-------------|-----------|--------|-------|
|                          |                      |                            |                   |             |           |        |       |
| Age                      | Primary analysis     | 13                         | 9                 | 130,349     | 1.34      | 1.17   | 1.55  |
|                          | Sensitivity analysis | 10                         | 7                 | 128,867     | 1.31      | 1.11   | 1.55  |
| Sex                      | Primary analysis     | 5                          | 5                 | 48,262      | 1.03      | 0.80   | 1.33  |
|                          | Sensitivity analysis | 2                          | 2                 | 47,403      | 1.00      | 0.68   | 1.48  |
| Immobility               | Primary analysis     | 11                         | 8                 | 83,134      | 2.92      | 2.09   | 4.08  |
|                          | Sensitivity analysis | 8                          | 6                 | 81,652      | 2.69      | 1.64   | 4.40  |
| Paresis                  | Primary analysis     | 4                          | 4                 | 16,214      | 2.97      | 1.20   | 7.36  |
|                          | Sensitivity analysis | 3                          | 3                 | 16,112      | 2.48      | 0.77   | 8.05  |
| Previous VTE             | Primary analysis     | 9                          | 8                 | 84,403      | 6.08      | 3.71   | 9.97  |
|                          | Sensitivity analysis | 8                          | 7                 | 83,945      | 6.51      | 3.81   | 11.12 |
| Active malignancy        | Primary analysis     | 9                          | 9                 | 128,853     | 2.65      | 1.79   | 3.91  |
|                          | Sensitivity analysis | 7                          | 7                 | 128,293     | 2.81      | 1.89   | 4.18  |
| Critical illness         | Primary analysis     | 7                          | 7                 | 65,777      | 1.65      | 1.39   | 1.95  |
|                          | Sensitivity analysis | 6                          | 6                 | 65,319      | 1.63      | 1.37   | 1.93  |
| Infections               | Primary analysis     | 9                          | 5                 | 66,898      | 1.48      | 1.16   | 1.89  |
|                          | Sensitivity analysis | 8                          | 4                 | 66,440      | 1.42      | 1.09   | 1.87  |
| Acute heart failure      | Primary analysis     | 2                          | 2                 | 64,006      | 0.82      | 0.42   | 1.60  |
|                          | Sensitivity analysis | 1                          | 1                 | 63,548      | 1.08      | 0.84   | 1.39  |
| History of heart failure | Primary analysis     | 4                          | 3                 | 2,291       | 2.68      | 1.11   | 6.44  |
|                          | Sensitivity analysis | 3                          | 2                 | 1,992       | 2.96      | 1.03   | 8.49  |
| Severe stroke            | Primary analysis     | 5                          | 4                 | 66,227      | 1.79      | 0.77   | 4.18  |
|                          | Sensitivity analysis | 4                          | 3                 | 65,769      | 2.00      | 0.69   | 5.78  |
| Respiratory failure      | Primary analysis     | 6                          | 4                 | 66,710      | 1.04      | 0.69   | 1.58  |
|                          | Sensitivity analysis | 5                          | 3                 | 66,252      | 1.05      | 0.68   | 1.61  |
| Coronary artery disease  | Primary analysis     | 4                          | 4                 | 65,912      | 1.01      | 0.33   | 3.09  |
|                          | Sensitivity analysis | 2                          | 2                 | 65,352      | 2.02      | 0.32   | 12.64 |



**Online only supplemental figures**

**Part 1**

**Supplemental Figures:**

*sFigure 1: Forest plots showing the association between candidate prognostic factors and the outcome venous thromboembolism-*

*Part 1 (From sFigure 1A- sFigure 1R)*

**sFigure 1: Forest plots showing the association between candidate prognostic factors and the outcome venous thromboembolism-**

**Part 1 (From sFigure 1A- sFigure 1R)**

**sFigure 1A: Forest plots showing the association between age and the outcome VTE**

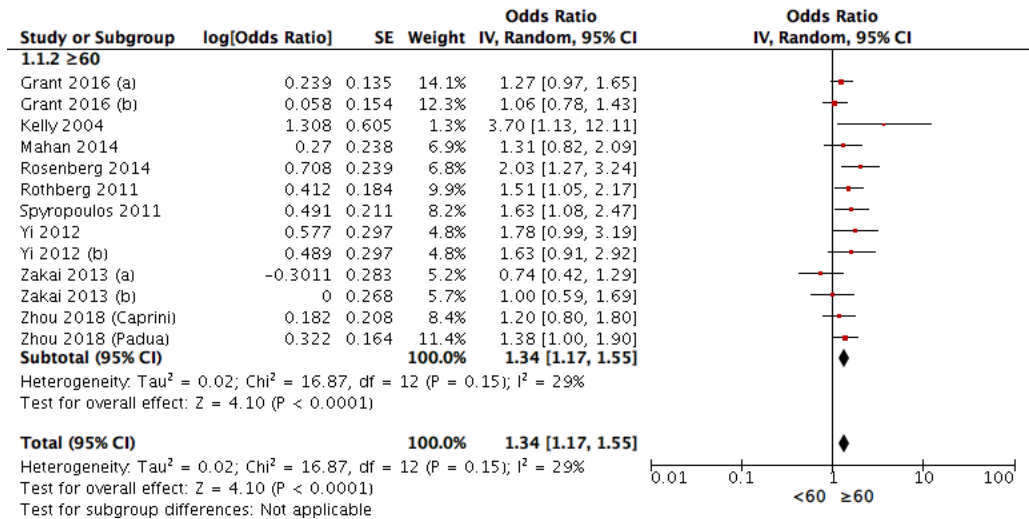



sFigure 1B: Forest plot showing the association between sex and the outcome VTE

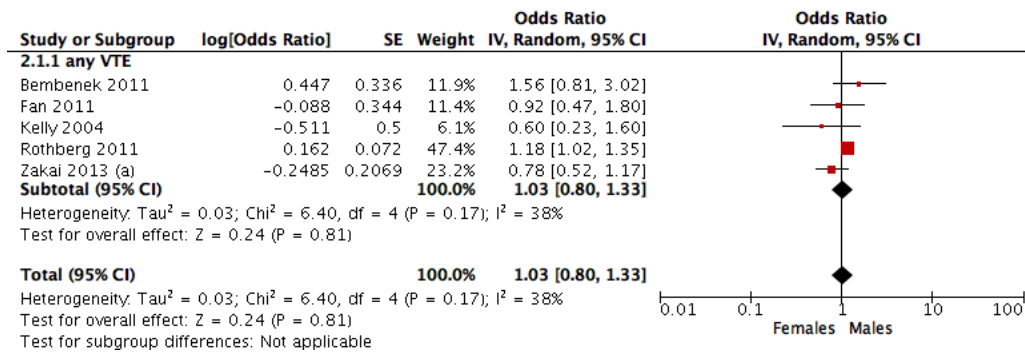

sFigure 1C: Forest plot showing the association between C-reactive protein and the outcome VTE

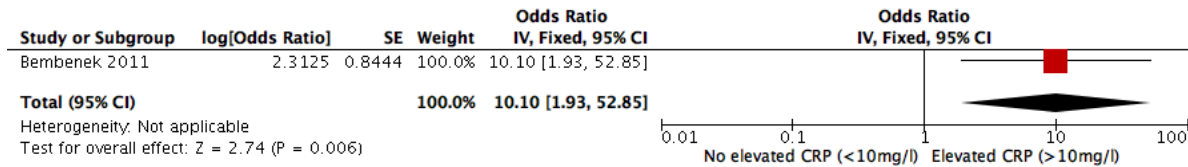

sFigure 1D: Forest plots showing the association between D-Dimer and the outcome VTE

sFigure 1.1D: D-dimer (categorical)

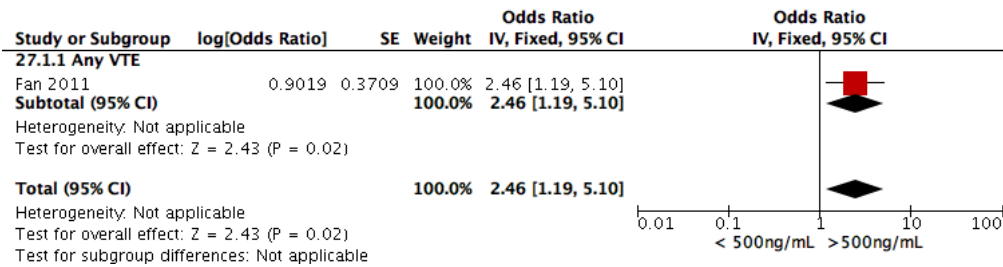

sFigure 1.2D: D-dimer (continuous)

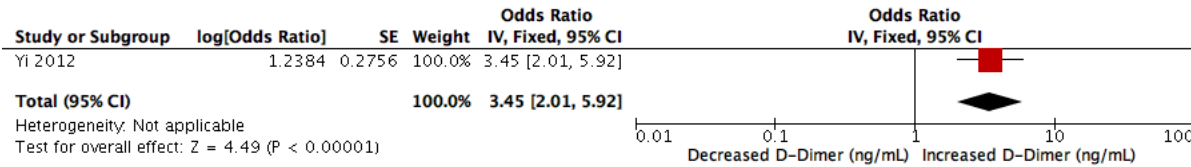

sFigure 1E: Forest plot showing the association between heart rate and the outcome VTE

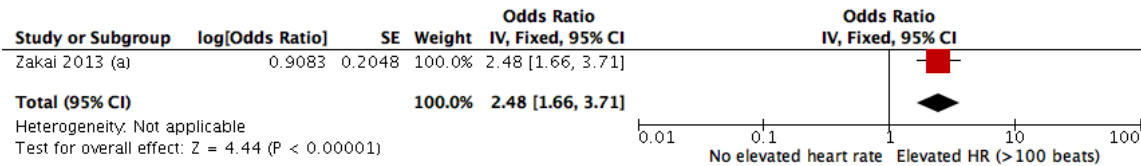

sFigure 1F: Forest plot showing the association between thrombocytosis and the outcome VTE

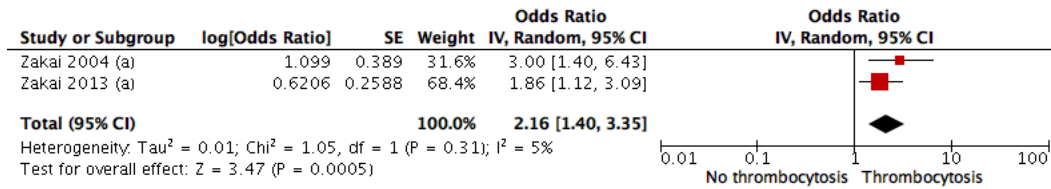

sFigure 1G: Forest plot showing the association between leukocytosis and the outcome VTE

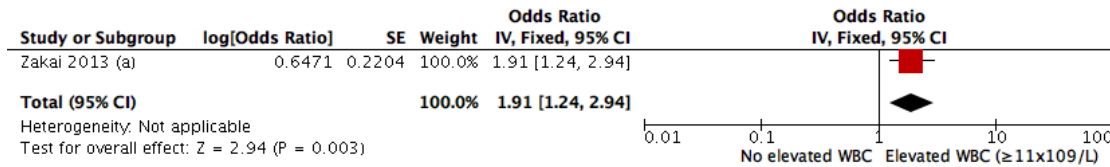

sFigure 1H: Forest plot showing the association between fever and the outcome VTE

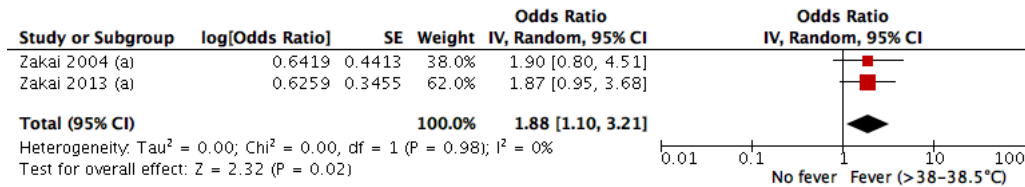

sFigure 1I: Forest plot showing the association between leg edema and the outcome VTE

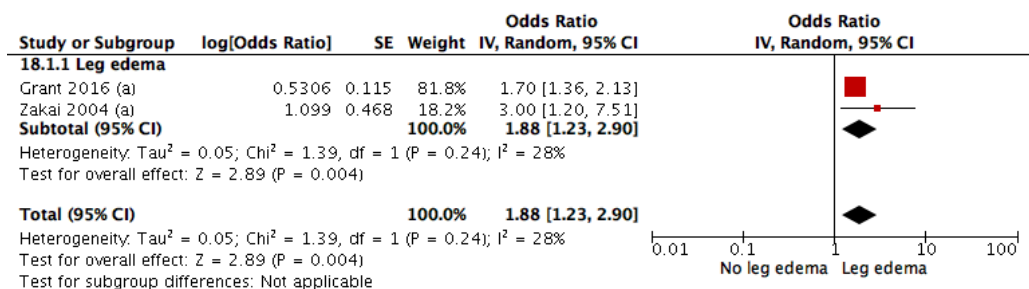

sFigure 1J: Forest plot showing the association between varicose veins and the outcome VTE

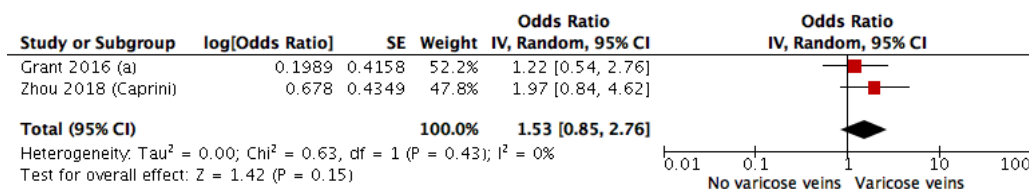

sFigure 1K: Forest plot showing the association between obesity and the outcome VTE

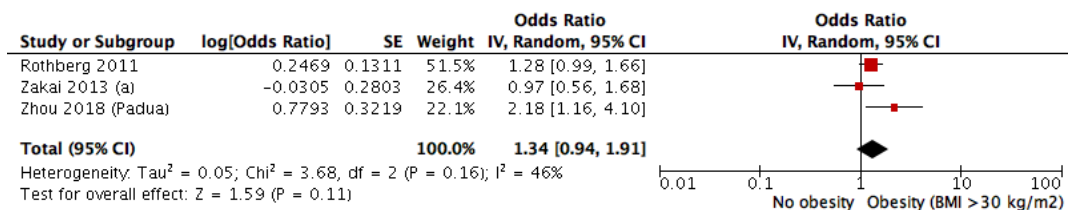

sFigure 1L: Forest plot showing the association between Fibrinogen levels and the outcome VTE

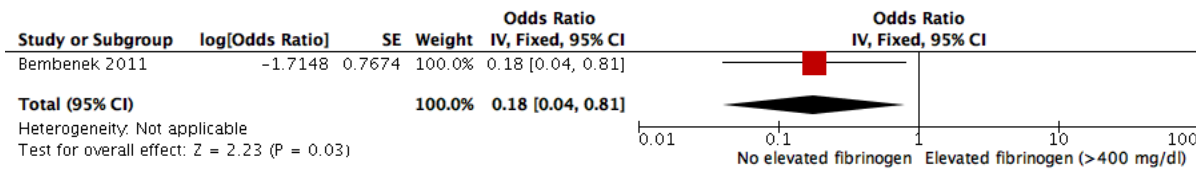

sFigure 1M: Forest plots showing the association between Barthel index score and the outcome VTE

sFigure 1.1M: Barthel index score (categorical)

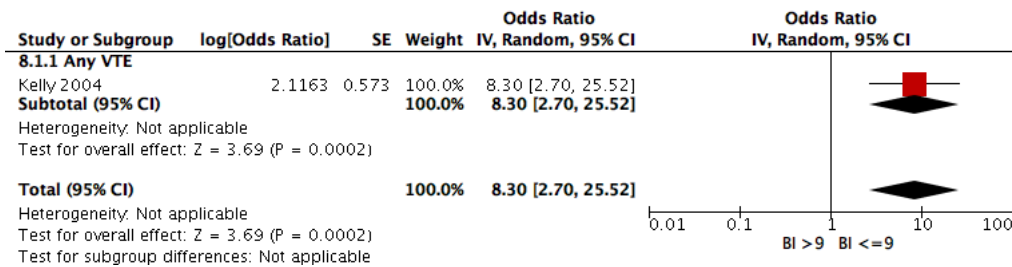

sFigure 1.2M: Barthel index score (continuous)

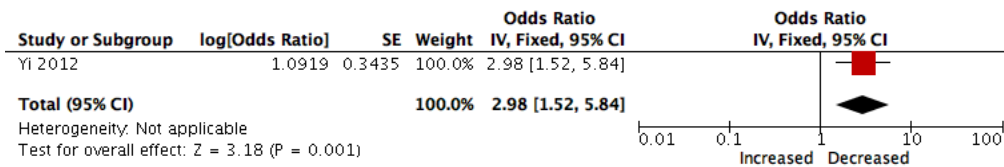

**sFigure 1N: Forest plot showing the association between immobility and the outcome VTE**

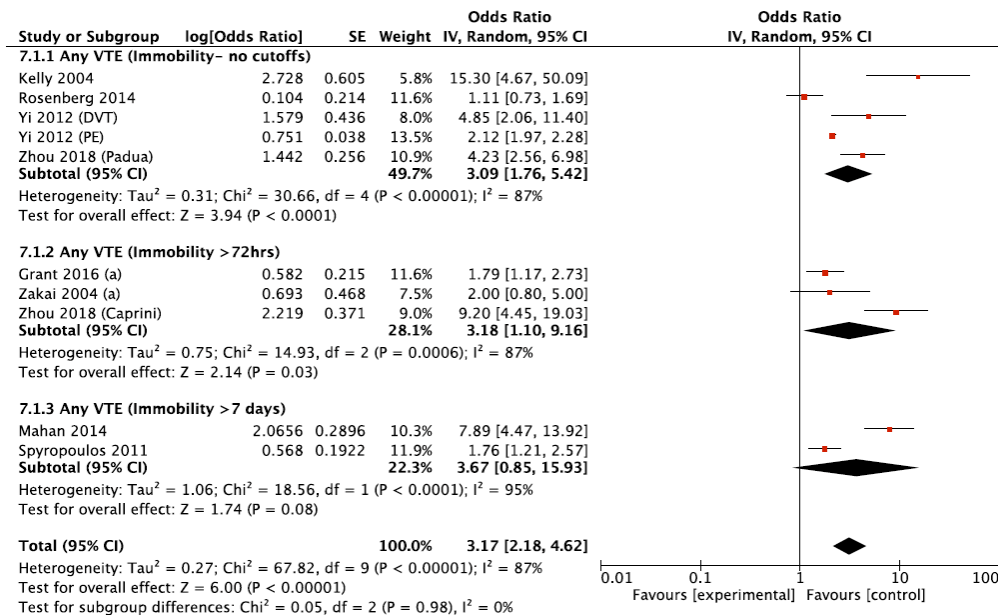

sFigure 1O: Forest plot showing the association between paresis and the outcome VTE

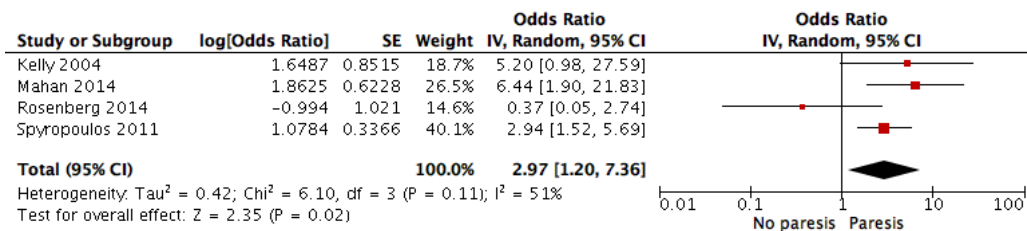

sFigure 1P: Forest plot showing the association between previous VTE and the outcome VTE

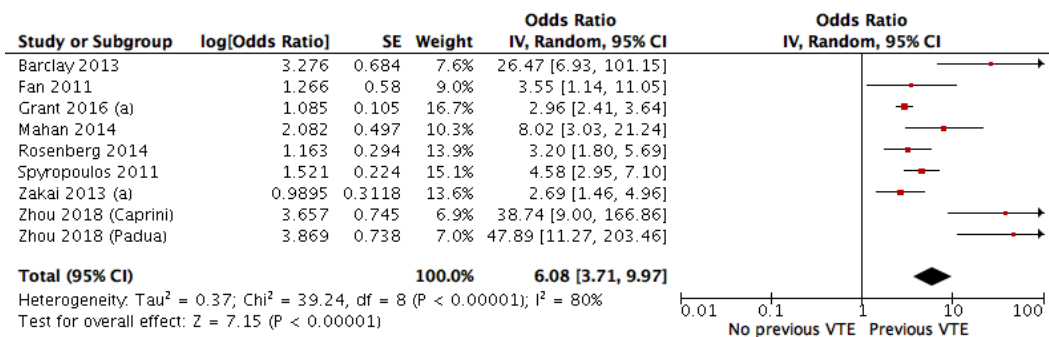

sFigure 1Q: Forest plot showing the association between thrombophilia and the outcome VTE

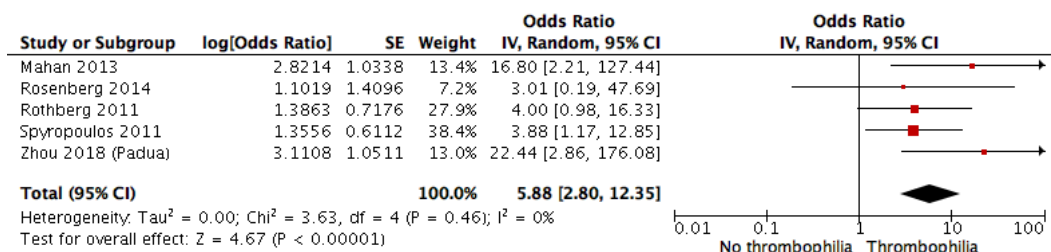

sFigure 1R: Forest plots showing the association between malignancy and the outcome VTE

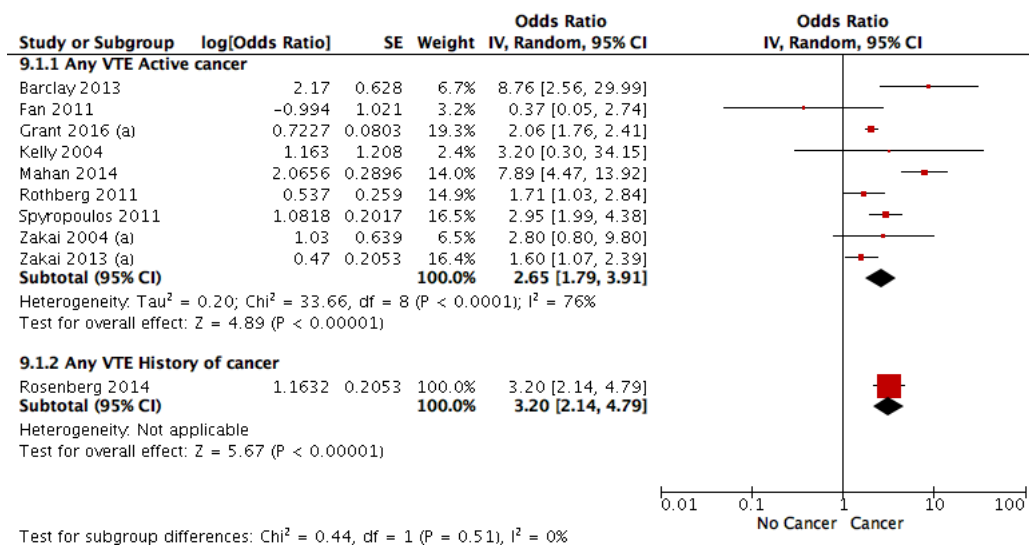



Online only supplemental figures

Part 2

**Supplemental Figures:**

*sFigure 1: Forest plots showing the association between candidate prognostic factors and the outcome venous thromboembolism-*

*Part 2 (from sFigure 1S- sFigure 1AC)*

*sFigure 2: Forest plots showing the association between candidate prognostic factors and the outcome bleeding*

**sFigure 1: Forest plots showing the association between candidate prognostic factors and the outcome venous thromboembolism-**

**Part 2 (from sFigure 1S- sFigure 1AC)**

**sFigure 1S: Forest plot showing the association between critical illness and the outcome VTE**

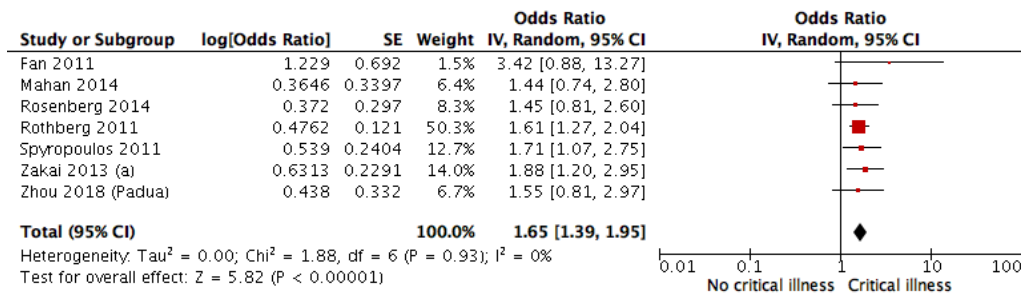

**sFigure 1T: Forest plot showing the association between infections and the outcome VTE**

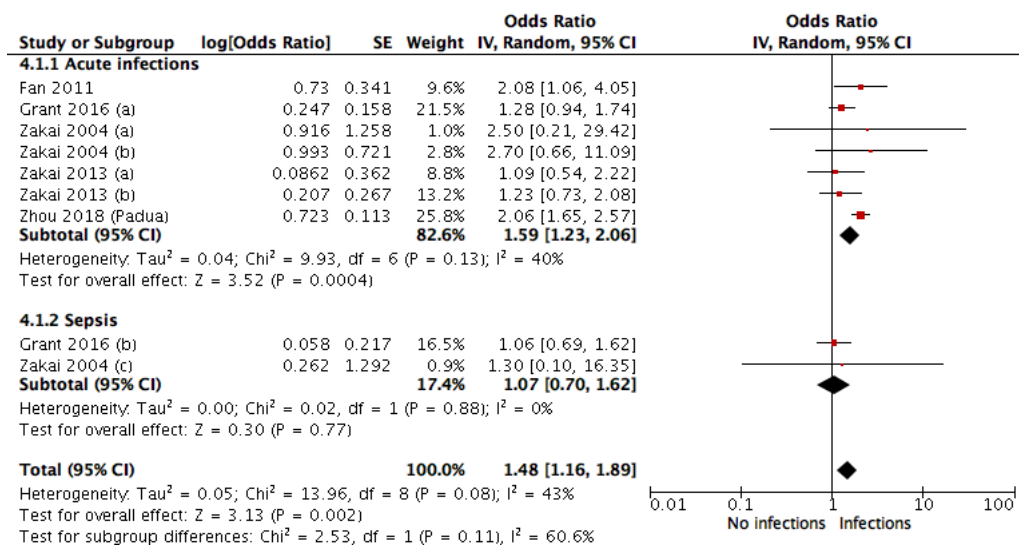

sFigure 1U: Forest plots showing the association between heart failure for the outcome VTE

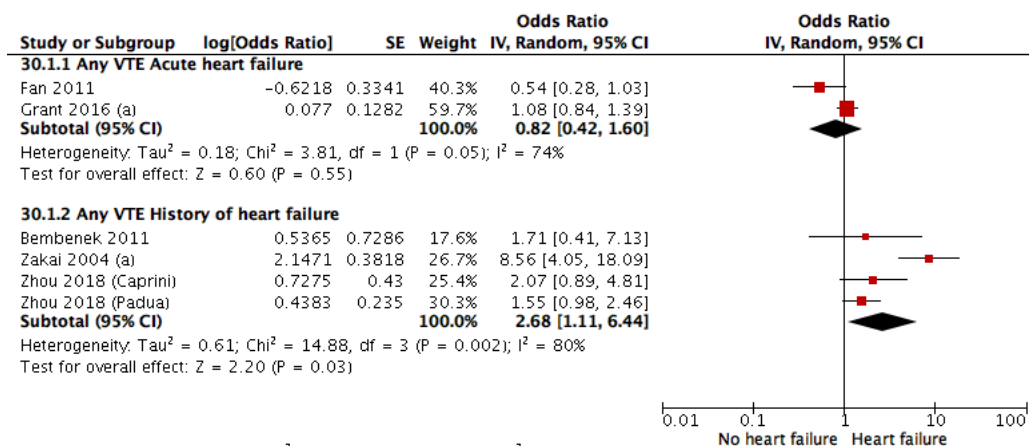

sFigure 1V: Forest plot showing the association between autoimmune disease and the outcome VTE

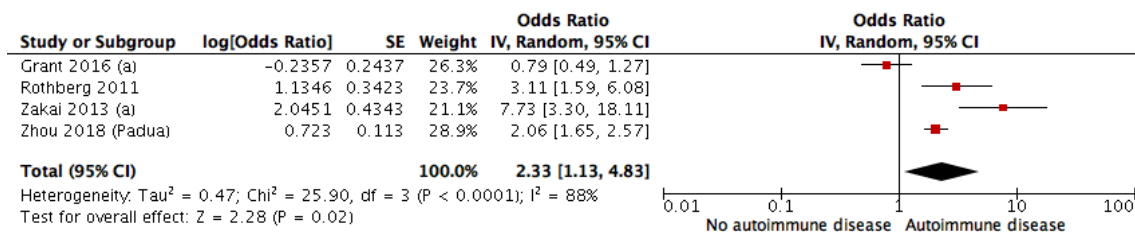

sFigure 1W: Forest plot showing the association between central venous catheters and the outcome VTE

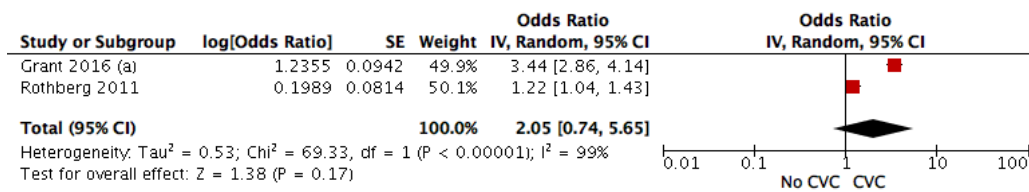

**Figure 1X: Forest plot showing the association between severe stroke and the outcome VTE**

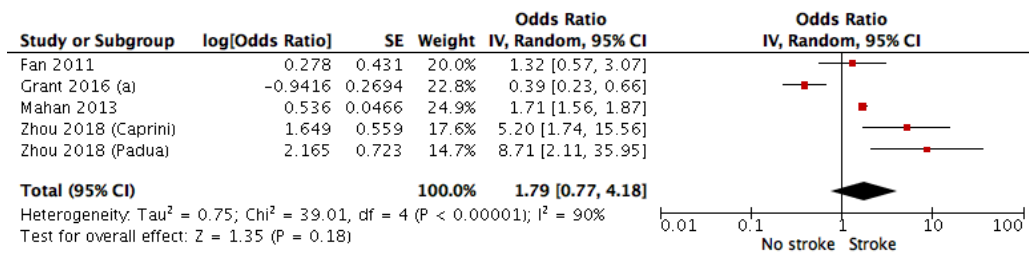

sFigure 1Y: Forest plots showing the association between tobacco and the outcome VTE

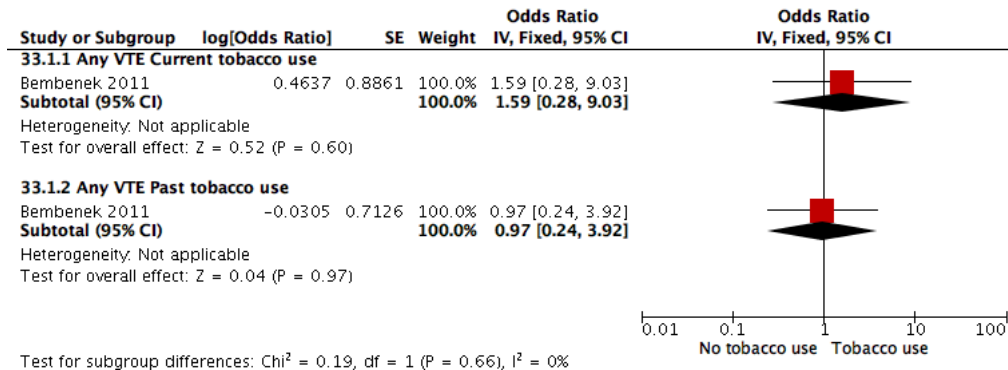

sFigure 1Z: Forest plot showing the association between hormone use and the outcome VTE

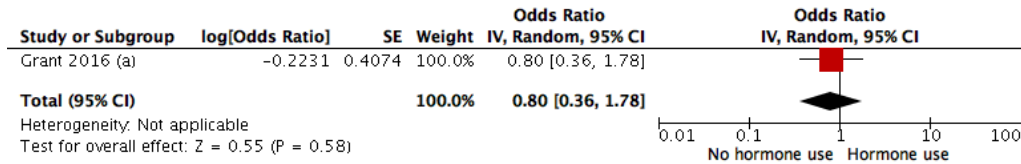

sFigure 1AA: Forest plot showing the association between renal failure and the outcome VTE

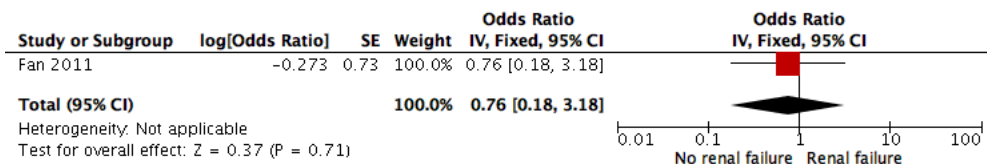

sFigure 1AB: Forest plot showing the association between respiratory failure and the outcome VTE

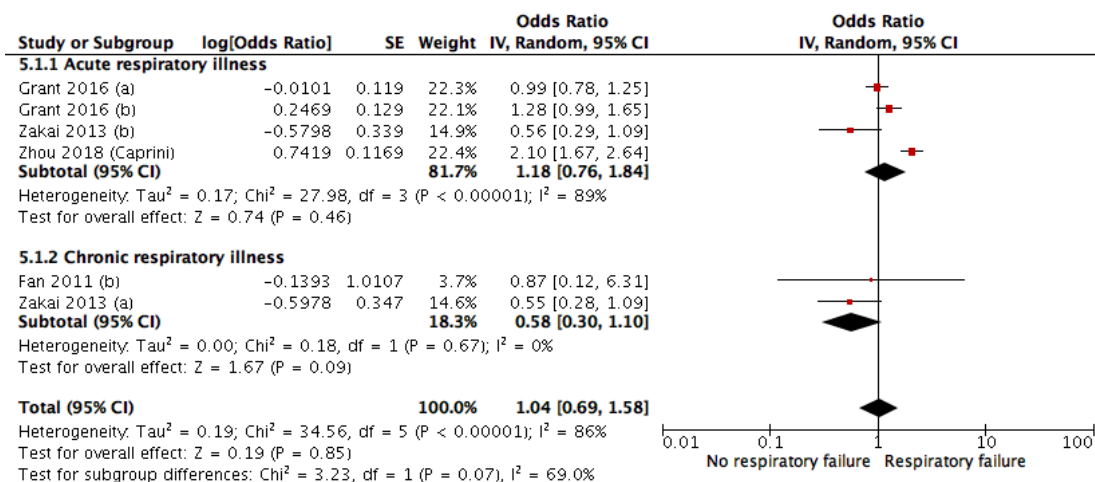

**sFigure 1AC: Forest plot showing the association between coronary artery disease and the outcome VTE**

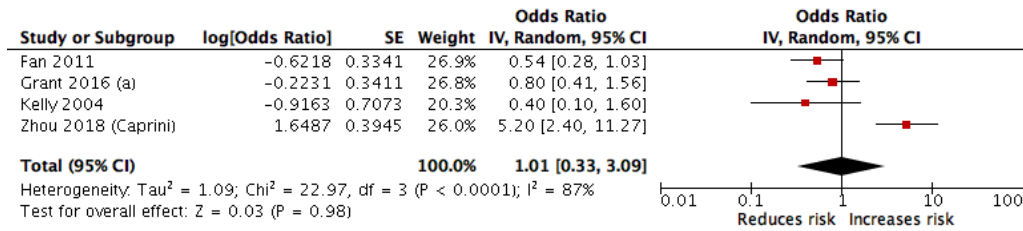



**sFigure 2: Forest plots showing the association between candidate prognostic factors and the outcome bleeding**

**eFigure 2A: Forest plots showing the association between age and the outcome bleeding**

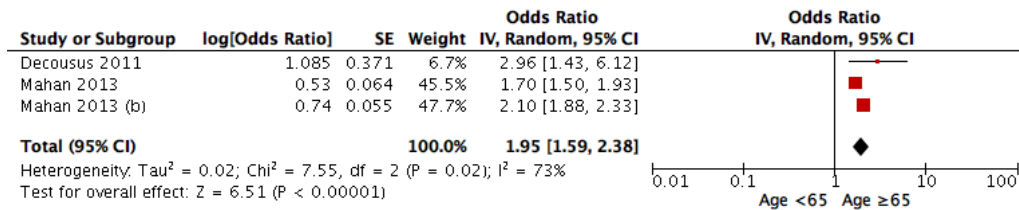

**sFigure 2B: Forest plot showing the association between sex and the outcome bleeding**

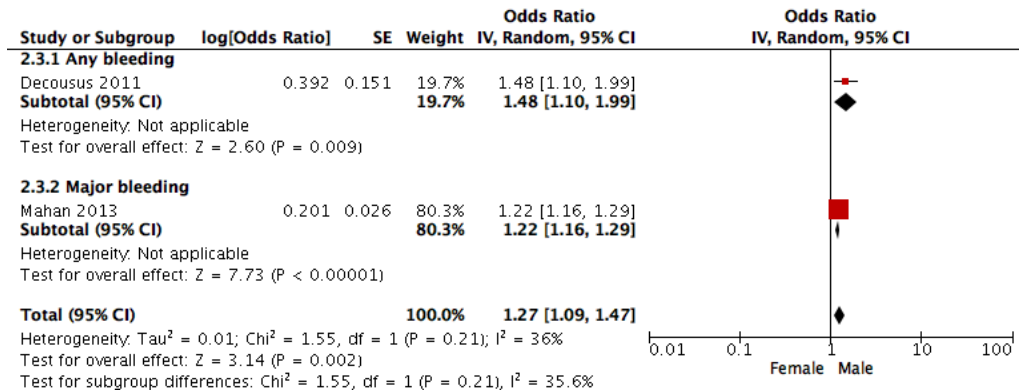

**sFigure 2C: Forest plot showing the association between anemia as a reason for admission and the outcome bleeding**

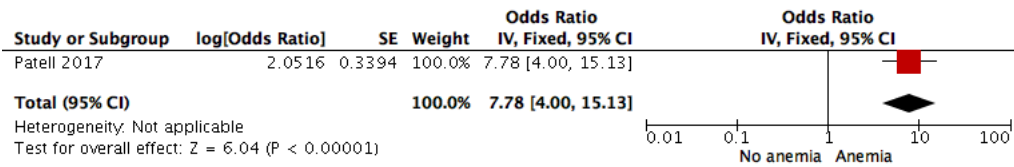

sFigure 2D: Forest plot showing the association between obesity and the outcome bleeding

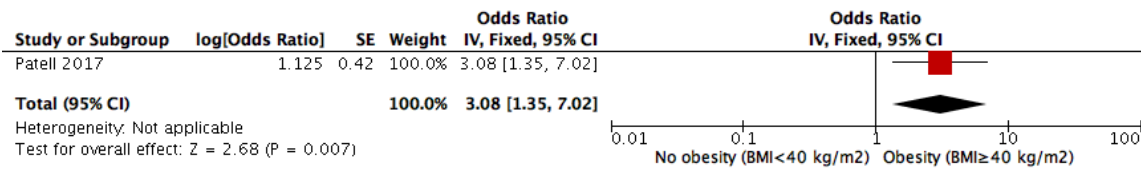

sFigure 2E: Forest plot of low hemoglobin for the outcome bleeding

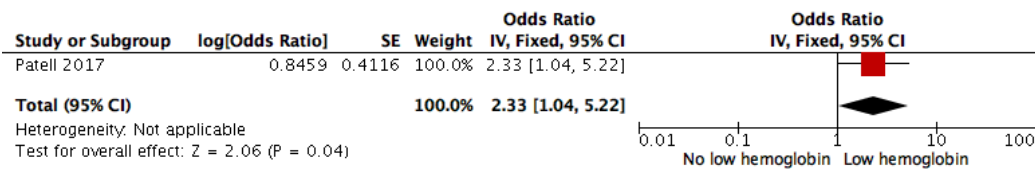

sFigure 2F: Forest plot showing the association between gastro-duodenal ulcers and the outcome bleeding

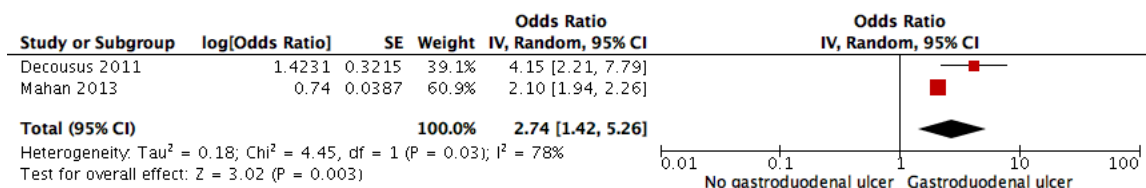

sFigure 2G: Forest plot showing the association between rehospitalisation and the outcome bleeding

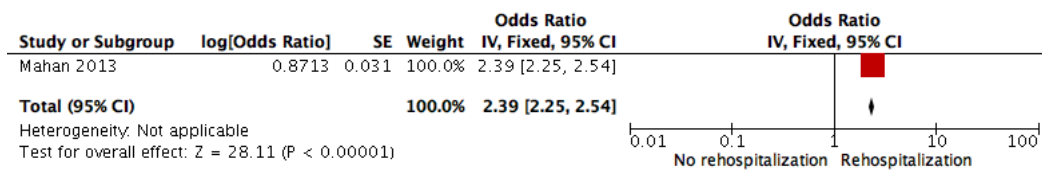

sFigure 2H: Forest plot showing the association between critical illness and the outcome bleeding

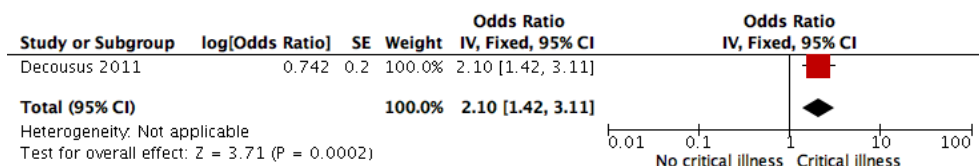

sFigure 2I: Forest plot showing the association between thrombocytopenia and the outcome bleeding

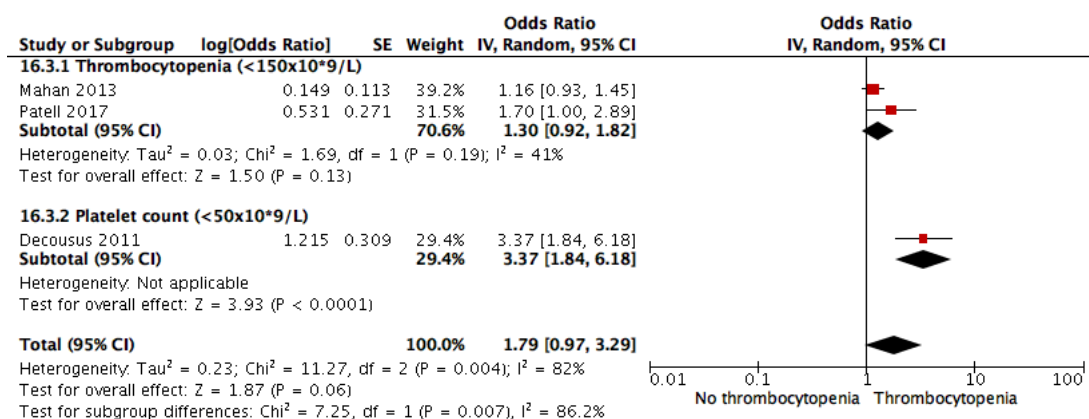

sFigure 2J: Forest plot showing the association between blood syncrasias and the outcome bleeding

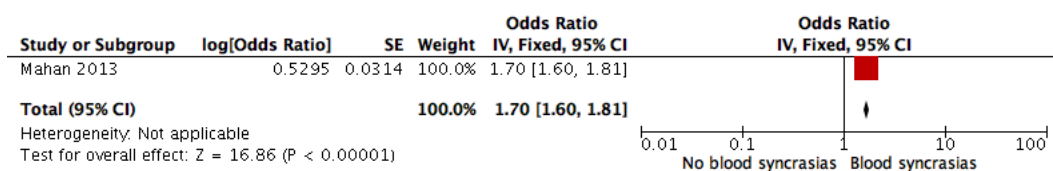

sFigure 2K: Forest plot showing the association between hepatic disease and the outcome bleeding

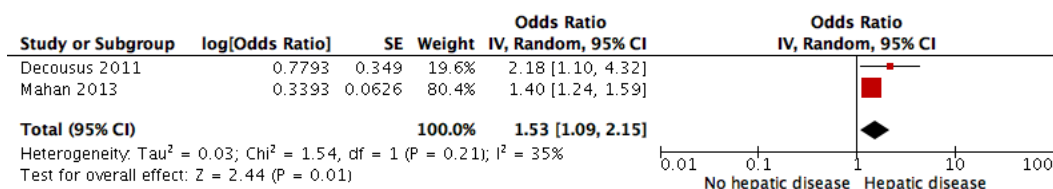

sFigure 2L: Forest plot showing the association between renal failure and the outcome bleeding

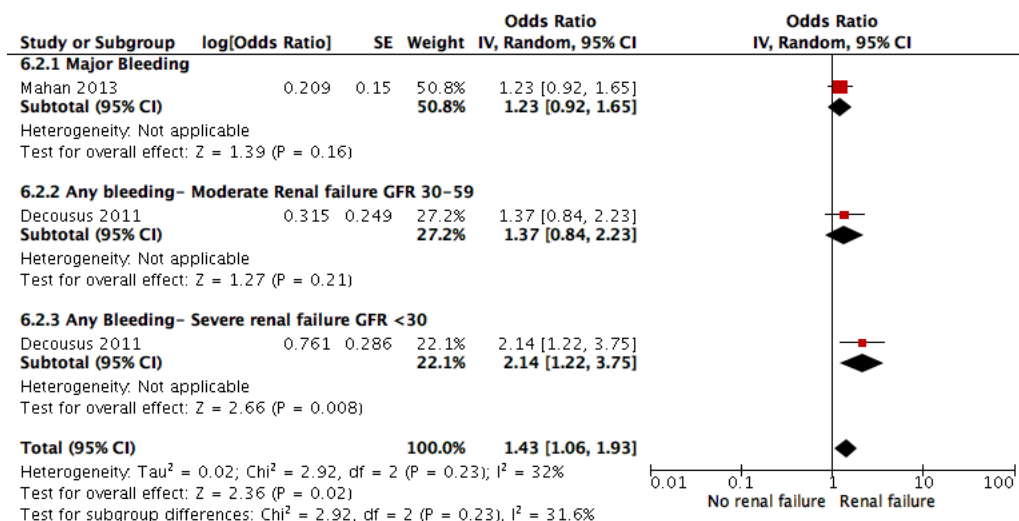

sFigure 2M: Forest plot showing the association between antithrombotic medication and the outcome bleeding

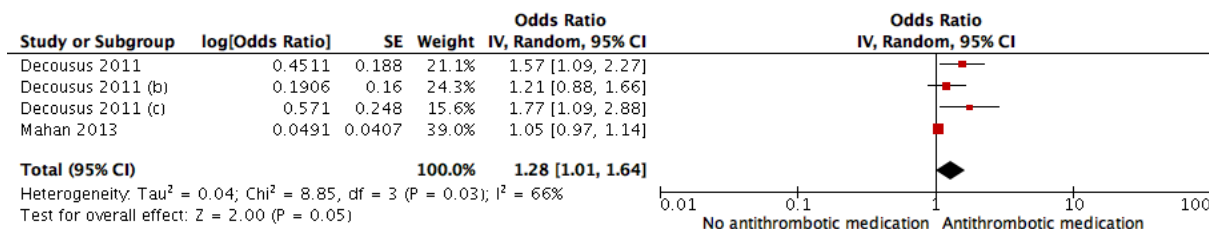

sFigure 2N: Forest plot showing the association between central venous catheters and the outcome bleeding

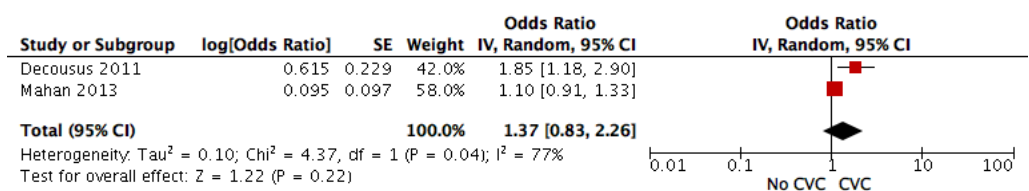

**sFigure 2O: Forest plot showing the association between autoimmune disease and the outcome bleeding**

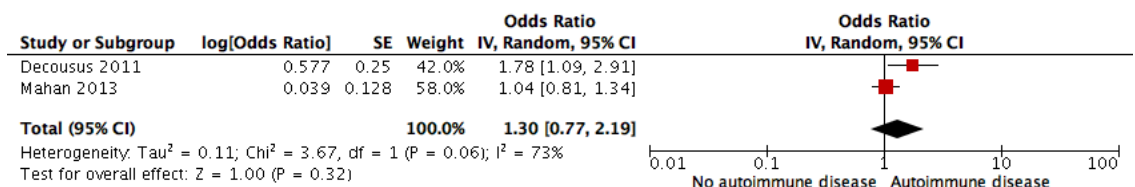

**sFigure 2P: Forest plot showing the association between hormone use and the outcome bleeding**

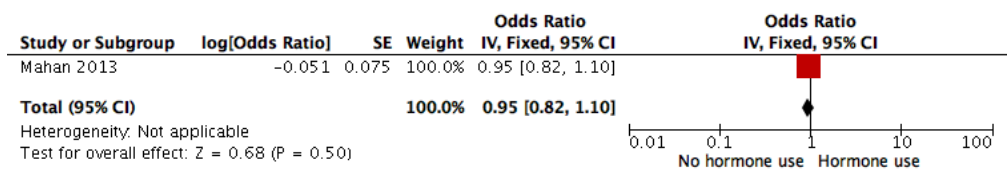

**sFigure 2Q: Forest plot showing the association between malignancy and the outcome bleeding**

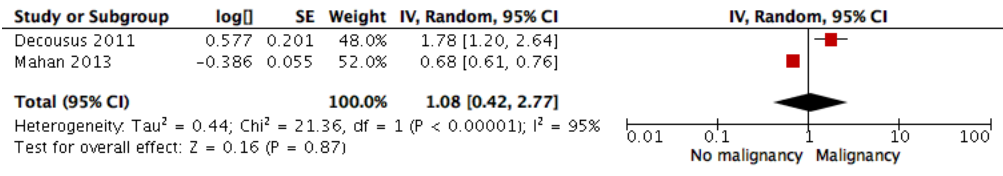

Supplement: bloodBLD2019003603-suppl1.pdf [file bloodBLD2019003603-suppl1.pdf]
